# Supplementary material for: Separate responses of karyopherins to glucose and amino acid availability regulate nucleocytoplasmic transport
Source: PubMed Central journal article supplement — Mol Biol Cell. 2014 Sep 15;25(18):2840–52. doi: 10.1091/mbc.E14-04-0948 (PMC4161518; doi:10.1091/mbc.e14-04-0948), 2014-09-15
Supplement: supp_E14-04-0948_CombinedSupMats.pdf [file supp_E14-04-0948_CombinedSupMats.pdf]

# Supplemental Materials

*Molecular Biology of the Cell*

Huang et al.

## **Separate responses of karyopherins to glucose and amino acid availability regulate nucleocytoplasmic transport**

Huang and Hopper

### **Supplementary materials**

#### **Supplementary method**

##### **Protein purification**

Yeast cultures were grown at 30°C to OD<sub>600</sub> of 0.4-0.6. Harvested cells were rapidly frozen in liquid nitrogen and broken by milling. Cryolysis was performed using a planetary ball mill. Pull down assays were performed as described (Alber et al, 2007) with some alterations for optimizations. In brief, 0.5 g of frozen ground cells were resuspended in 4.5 ml of the extraction buffer (20 mM Hepes, pH 6.1, 110 mM KOAc, 2 mM MgCl<sub>2</sub>, 75 mM NaCl, 0.5% Triton, 0.1% Tween-20, 1 mM DTT) with 1: 100 dilutions of protease inhibitor cocktail set IV (Calbiochem). The suspension was clarified by centrifugation at 3000 xg, 4°C for 10 min. The soluble extract was incubated with IgG-conjugated magnetic beads at 4°C for 30 min. The magnetic beads were then collected with a magnet, washed six times with 1 ml of the ice-cold extraction buffer and once with 0.1 M NH<sub>4</sub>OAc, 0.1 mM MgCl<sub>2</sub>, 0.02% Tween-20. Proteins were eluted with 0.5 M NH<sub>4</sub>OH, 0.5 mM EDTA by incubation for 20 min at room temperature. The eluates were lyophilized in a SpeedVac (Thermo Savant) overnight. The pellets were resuspended in NuPAGE LDS sample buffer (Life technologies), and separated on a 4-12% NuPAGE Novex Bis-Tris precast gel (Life technologies) according to the manufacturer's specifications.

##### **Mass spectrometry analysis**

Protein bands within gels were excised and the samples were analyzed by the Ohio State University Campus Chemical Instrument Center Mass Spectrometry and Proteomics Facility (<http://www.ccic.ohio-state.edu/MSP>).

##### **Oligonucleotide sequences**

The following primer sequences were used: IVY79/forward primer for C-terminal tagging of Msn5 (CATTGAAGACGGTGCTGTGGGTAATCTCTTTGATGACAACcggatccccgggtaattaa), IVY80/reverse primer for C-terminal tagging of Msn5 (CTTCAGAAATACCTTGTTTCAGACCCACATTAAACGCTTGgaattcgagctcgtttaaac), IVY163/forward primer for C-terminal tagging of Los1 (GTTTGTAGATAATTTTCATTTCTGTTTTAAAGCAAGGTCAAcggatccccgggtaattaa), IVY164/reverse primer for C-terminal tagging of Los1 (GCTAAACCAAAGTGAATGATAAGTCTAATTACATATTACCgaattcgagctcgtttaaac), IVY169/forward primer for C-terminal tagging of Kap95 (AAGATGGGCTAGAGAGCAACAGAAGCGTCAATTATCCTTAcggatccccgggtaattaa), IVY170/reverse primer for C-terminal tagging of Kap95 (GGTAAAATAACAAATTAATTATGATCAAAGAGAAAT GCCCgaattcgagctcgtttaaac). An upper case letter indicates the sequence for homologous recombination of target gene. A lower case letter indicates the sequence targeting to the tagging cassette plasmid (Longtine et al., 1998).

Table S1. Post-translational modifications of Msn5 and Los1

## 1. Msn5

| K <sub>430</sub> -Acetylation of Msn5                                           |                        |                        |                        |                        |       |       |
|---------------------------------------------------------------------------------|------------------------|------------------------|------------------------|------------------------|-------|-------|
| Peptide Sequence                                                                | Theoretical<br>m/z     | Measured<br>m/z        | Mass<br>error<br>(PPM) | Relative Abundance (%) |       |       |
|                                                                                 |                        |                        |                        | Fed                    | -aa   | -glu  |
| <sup>430</sup> KFAEIDFQSK <sub>439</sub> <sup>a</sup>                           | 606.8166 <sup>2+</sup> | 606.8231 <sup>2+</sup> | 10.8                   | 96.46                  | 97.72 | 98.22 |
| <sup>430</sup> K <sub>(Acetylation)</sub> FAEIDFQSK <sub>439</sub> <sup>b</sup> | 627.8219 <sup>2+</sup> | 627.8206 <sup>2+</sup> | -2.07                  | 3.54                   | 2.28  | 1.78  |

| K <sub>1013</sub> -DiMethylation of Msn5                                                      |                        |                        |                        |                        |       |       |
|-----------------------------------------------------------------------------------------------|------------------------|------------------------|------------------------|------------------------|-------|-------|
| Peptide Sequence                                                                              | Theoretical<br>m/z     | Measured<br>m/z        | Mass<br>error<br>(PPM) | Relative Abundance (%) |       |       |
|                                                                                               |                        |                        |                        | Fed                    | -aa   | -glu  |
| <sup>997</sup> IVID <sub>(CAM)</sub> CVGQGNANPN<br>SAK <sub>1013</sub> <sup>a</sup>           | 878.9360 <sup>2+</sup> | 878.9393 <sup>2+</sup> | 3.8                    | 99.98                  | 99.98 | 99.95 |
| <sup>997</sup> IVID <sub>(CAM)</sub> CVGQGNANPN<br>SAK <sub>(DiMethyl)1013</sub> <sup>b</sup> | 892.9516 <sup>2+</sup> | 892.9321 <sup>2+</sup> | -21.84                 | 0.02                   | 0.02  | 0.05  |

- a. Relative Abundance of unmodified peptide =  $\text{Peak Area}_{(\text{unmodified})} / (\text{Peak Area}_{(\text{modified})} + \text{Peak Area}_{(\text{unmodified})}) * 100$
- b. Relative Abundance of modified peptide =  $\text{Peak Area}_{(\text{modified})} / (\text{Peak Area}_{(\text{modified})} + \text{Peak Area}_{(\text{unmodified})}) * 100$

## 2. Los1

| K <sub>426</sub> -Methylation of Los1                                         |                        |                        |                        |                           |     |      |
|-------------------------------------------------------------------------------|------------------------|------------------------|------------------------|---------------------------|-----|------|
| Peptide Sequence                                                              | Theoretical<br>m/z     | Measured<br>m/z        | Mass<br>error<br>(PPM) | Relative Abundance<br>(%) |     |      |
|                                                                               |                        |                        |                        | Fed                       | -aa | -glu |
| <sup>415</sup> DFLDNFQQIC <sub>(CAM)</sub> FK <sub>426</sub> <sup>a</sup>     | 787.8691 <sup>2+</sup> | 787.8688 <sup>2+</sup> | -0.38                  | 98                        | 98  | 98   |
| <sup>415</sup> DFLDNFQQIC <sub>(CAM)</sub> FK <sub>(Me)426</sub> <sup>b</sup> | 794.8769 <sup>2+</sup> | 794.8788 <sup>2+</sup> | 2.39                   | 2                         | 2   | 2    |

| E <sub>1047</sub> or E <sub>1049</sub> --- Methylation or K <sub>1052</sub> - Methylation of Los1        |                         |                         |                        |                           |     |      |
|----------------------------------------------------------------------------------------------------------|-------------------------|-------------------------|------------------------|---------------------------|-----|------|
| Peptide Sequence                                                                                         | Theoretical<br>m/z      | Measured<br>m/z         | Mass<br>error<br>(PPM) | Relative Abundance<br>(%) |     |      |
|                                                                                                          |                         |                         |                        | Fed                       | -aa | -glu |
| <sup>1035</sup> ELFIVSSNPTTNENEC <sub>(CAM)</sub><br>VK <sub>1052</sub> <sup>a</sup>                     | 1040.9964 <sup>2+</sup> | 1041.0012 <sup>2+</sup> | -4.6                   | 93                        | 93  | 93   |
| <sup>1035</sup> ELFIVSSNPTTNE <sub>(Me)</sub> NEC <sub>(CA</sub><br>M)VK <sub>1052</sub> <sup>b</sup> or | 1048.0042 <sup>2+</sup> | 1048.0038 <sup>2+</sup> | -0.38                  | 3                         | 2   | 2    |
| <sup>1035</sup> ELFIVSSNPTTNENE <sub>(Me)</sub> C <sub>(CA</sub><br>M)VK <sub>1052</sub> <sup>b</sup>    |                         |                         |                        |                           |     |      |
| <sup>1035</sup> ELFIVSSNPTTNENEC <sub>(CAM)</sub><br>VK <sub>(Me)1052</sub> <sup>b</sup>                 | 1048.0042 <sup>2+</sup> | 1048.0038 <sup>2+</sup> | -0.38                  | 5                         | 5   | 5    |

a. Relative Abundance of unmodified peptide =  $\text{Peak Area}_{(\text{unmodified})} / (\text{Peak Area}_{(\text{modified})} + \text{Peak Area}_{(\text{unmodified})}) * 100$

b. Relative Abundance of modified peptide =  $\text{Peak Area}_{(\text{modified})} / (\text{Peak Area}_{(\text{modified})} + \text{Peak Area}_{(\text{unmodified})}) * 100$

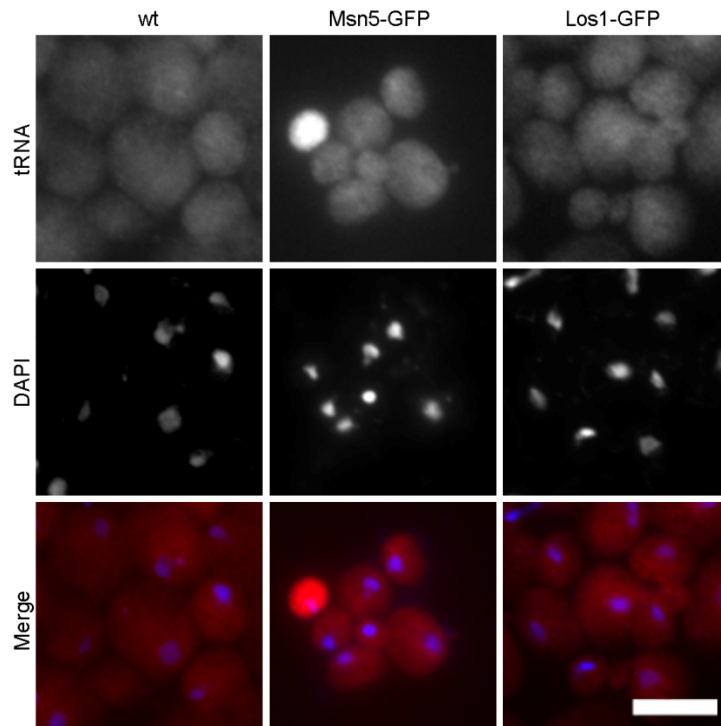

Figure S1. FISH analysis of the subcellular distribution of tRNA<sup>Tyr</sup> in wt, Msn5-GFP, and Los1-GFP cells. DAPI staining of DNA shows the location of the nucleus. Bar = 5  $\mu$ m.

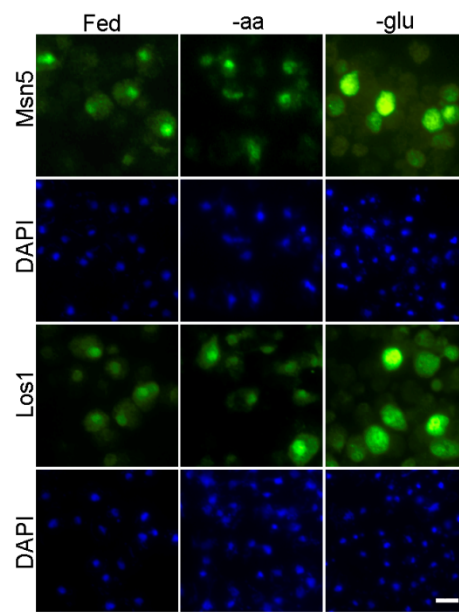

Figure S2. IF analysis of the subcellular distribution of multi-copy Msn5-Myc and Los1-Myc. Bar = 5  $\mu$ m.

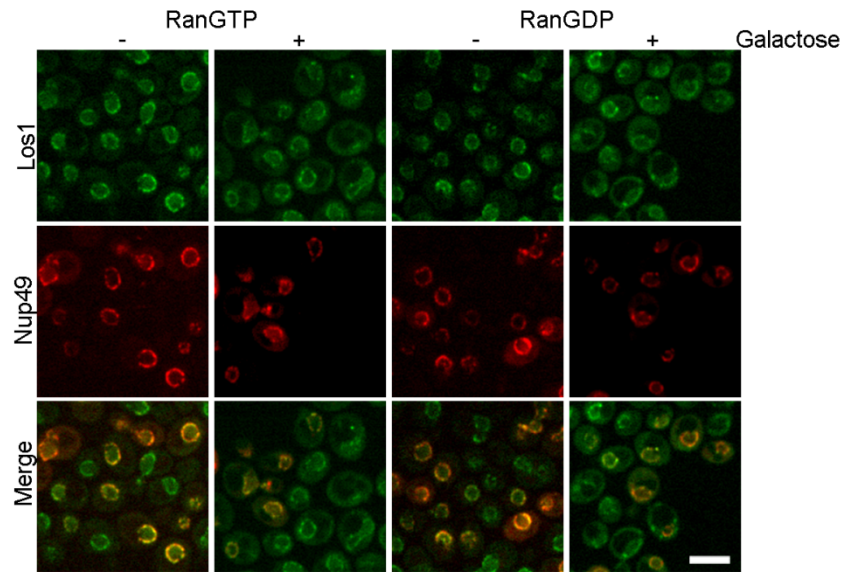

Figure S3. Confocal imaging of Los1-GFP in cells with galactose-inducible Ran locked in the GTP- or GDP-bound state.”-“, indicates the locations of proteins prior to addition of galactose.”+“, indicate the locations of proteins after addition of galactose for 2 hr. Bar = 5  $\mu$ m.

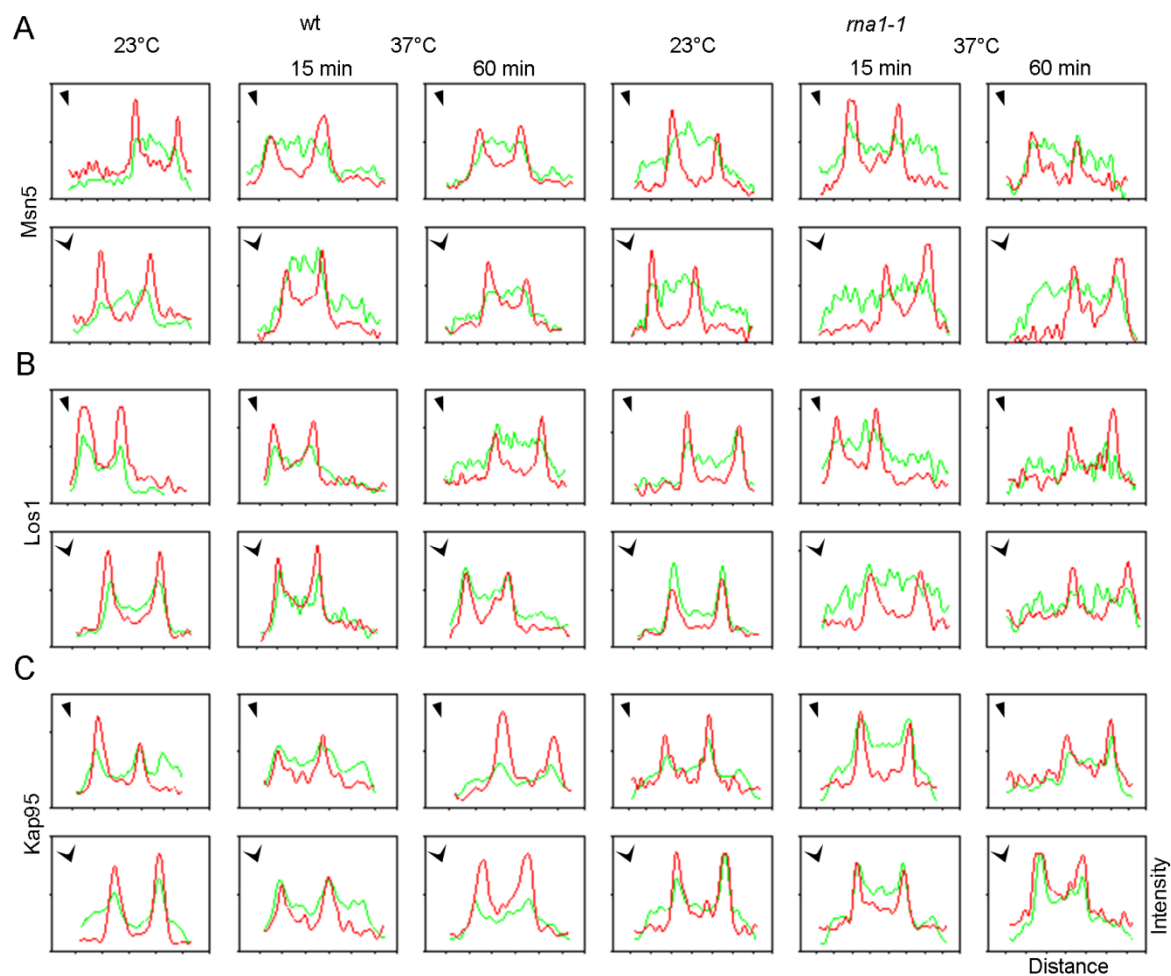

Figure S4. Intensity plot profiles of the subcellular distribution of (A) Msn5-GFP, (B) Los1-GFP, and (C) Kap95-GFP in wt and *rna1-1* ts mutant. The cells in Fig. 6 were scanned and plotted in Fig. S3 and are indicated with the same shape arrowheads. Red lines: Nup49-mCherry intensities; green lines: karyopherins-GFP intensities.

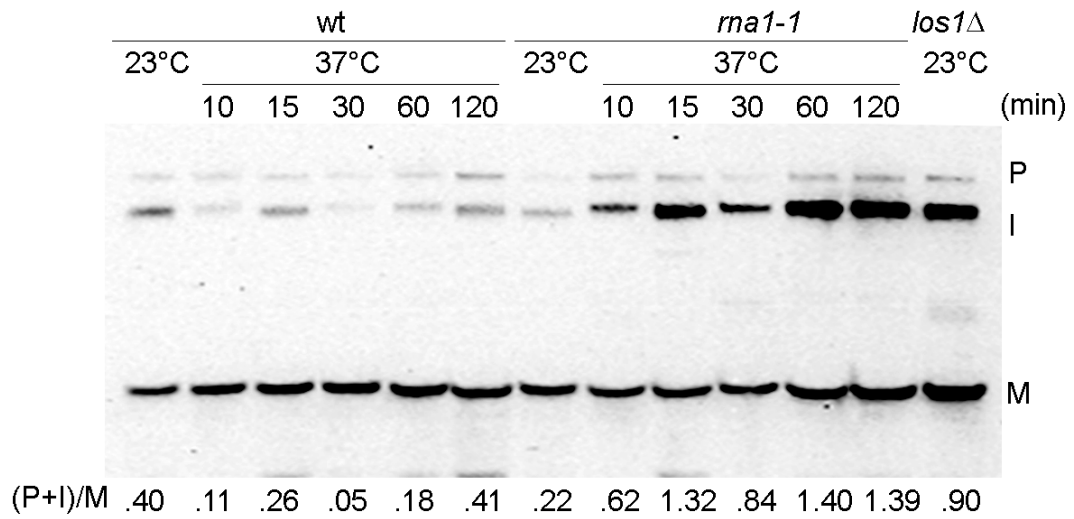

Figure S5. Pre-tRNAs accumulate in *rna1-1* cells. Northern analysis of pre-tRNA<sup>Ile</sup> and mature tRNA<sup>Ile</sup> in wt and mutant cells at permissive and non-permissive temperature for indicated times P, primary tRNA transcript; I, end-processed intron-containing pre-tRNA; M, mature tRNA. Ratio for (P+I)/M, both precursor tRNAs to mature tRNA.
